# Supplementary material for: Colorimetric Quantification for Residual Poly- DADMAC in Water Treatment
Source: Preprints.org preprint supplement (doi:10.20944/preprints202308.1663.v2), 2023-09-20
Supplement: Supplementary file 1 [file supplementary]

# Supplementary material

Colorimetric quantification for residual poly- DADMAC in water treatment

Ilil Levakov1, Ido Maor1,2,‡, Chen Barak1, Yael Kirshenbaum2 and Giora Rytwo 1,2,*

1 Environmental Physical Chemistry Laboratory, MIGAL-Galilee Research Institute, Kiryat Shmona,1101602, Israel

2 Environmental Sciences & Water Sciences Departments, Tel Hai College, Upper Galilee, 1220800 Israel

‡ Deceased

***** Correspondence: rytwo@telhai.ac.il or giorarytwo@gmail.com; Tel.: +972-4-7700516

Figure S1: Scheme of the experimental setup.

Figure S2: Spectra of an initial 20 µM FG upon complexation with the following increasing concentrations of commercial PD: 1 mM (red full line), 5 mM (gray square dots), 10 mM (blue dashes), 20 mM (orange long dashes), and 50 mM (green round dots. Full details on the preparation of the samples presented in section 2.2.

Figure S3: Normalized spectra of an initial 20 µM FG upon complexation with commercial PD in distilled water (blue full line), cyanobacteria polluted water (green dashed line) and cowshed effluents (red square dots). Vertical axis is normalized by the maximum absorption at 624nm of each spectrum, and slightly shifted up to emphasize similarity and/or difference in the spectra pattern. Additional information in section 3.5.
